# Supplementary material for: Long-Term Outcomes in Patients with Incident Chronic Obstructive Pulmonary Disease after Acute Kidney Injury: A Competing-Risk Analysis of a Nationwide Cohort
Source: PubMed Central journal article supplement (PMC6162866; doi:10.3390/jcm7090237), 2018-08-24
Supplement: jcm-07-00237-s001.pdf [file jcm-07-00237-s001.pdf]

## Supplementary file

**Table S1.** The risk factors predicting COPD in AKI patients after temporary dialysis as components in propensity score.

| Items                                      | OR    | lower 95% CI | upper 95% CI | <i>P</i> |
|--------------------------------------------|-------|--------------|--------------|----------|
| <b>Age</b>                                 | 1.041 | 1.036        | 1.047        | <0.001   |
| <b>Male</b>                                | 1.865 | 1.646        | 2.113        | <0.001   |
| <b><i>Baseline comorbidities</i></b>       |       |              |              |          |
| Charlson Comorbidity Index                 | 0.911 | 0.879        | 0.945        | <0.001   |
| Congestive heart failure                   | 1.219 | 1.039        | 1.431        | 0.015    |
| Cerebrovascular disease                    | 1.448 | 1.220        | 1.718        | <0.001   |
| <b><i>Medication for hypertension</i></b>  |       |              |              |          |
| Beta-Blocker                               | 0.859 | 0.755        | 0.978        | 0.021    |
| <b><i>Index hospital comorbidity</i></b>   |       |              |              |          |
| Cardiovascular                             | 0.735 | 0.599        | 0.902        | 0.003    |
| Respiratory                                | 1.759 | 1.537        | 2.012        | <0.001   |
| ICU admission during index hospitalization | 1.161 | 1.000        | 1.348        | 0.049    |

Hosmer-Lemeshow goodness of fit [GOF] test  $P=0.405$ , AUC= 0.811

Abbreviations: AKI, acute kidney injury; COPD, chronic obstructive pulmonary disease; ICU, intensive care unit.

**Figure S1.** Standardized difference between each covariate before and after propensity score matching

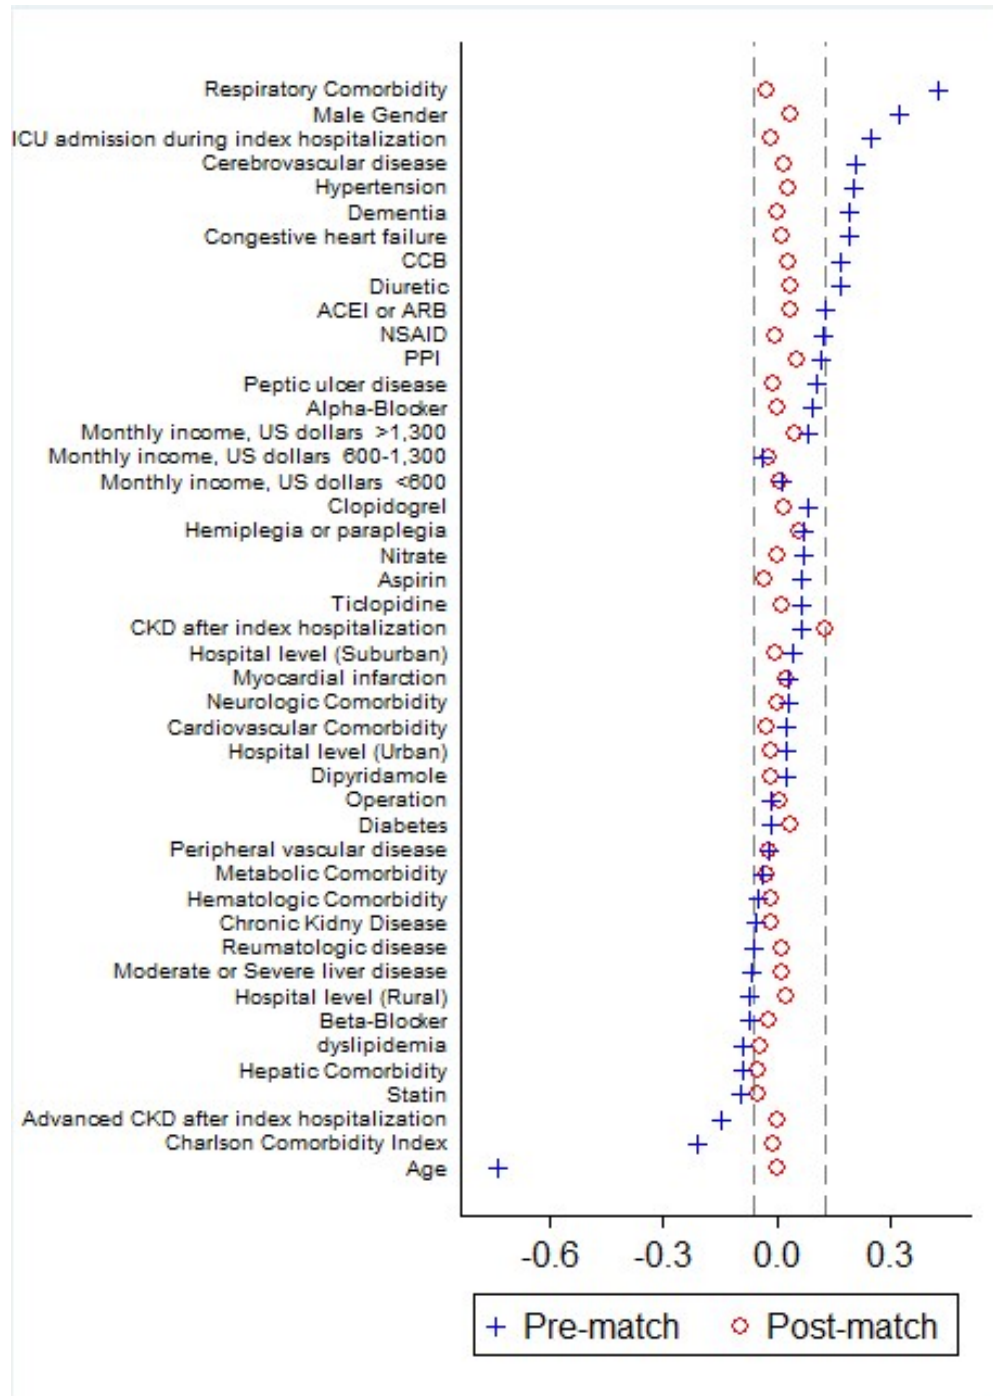

**Abbreviations:** ACEI, angiotensin-converting-enzyme inhibitors; ARB, Angiotensin II receptor blockers; CCB, calcium channel blocker; COPD, chronic obstructive pulmonary disease; GI, gastrointestinal; ICU, intensive care unit; NSAIDs, Non-steroidal anti-inflammatory drugs; PPI, proton-pump inhibitor; SD, standard deviation
